# Supplementary material for: Energetic copper(ii) quadridentate chelate: a novel green laser-sensitive primary explosive
Source: Royal Society of Chemistry journal article supplement (doi:10.1039/d4qi00489b), 2024-01-01
Supplement: d4qi00489b1.pdf [file d4qi00489b1.pdf]

## Supplementary Information

### Energetic Copper(II) Quadridentate Chelate: A Novel Green Laser-sensitive Primary Explosive

Qi Zhang,<sup>\*a</sup> Ruibing Lv,<sup>a</sup> Ying Wang,<sup>a</sup> Zhenghang Luo,<sup>a</sup> Pengyang Pan,<sup>a</sup> Tingwei Wang<sup>a</sup> and Quancheng Liu <sup>\*b</sup>

<sup>a</sup> Institute of Chemical Materials, China Academy of Engineering Physics (CAEP), Mianyang 621900, P. R. China.

<sup>b</sup> School of Information Engineering, Southwest University of Science and Technology, Mianyang 621010, P. R. China.

Corresponding author: Qi Zhang, Quancheng Liu

E-mail: jackzhang531@caep.cn (Q. Zhang); liuqc@swust.edu.cn (Q. Liu).

### Table of Contents

|                                                                          |    |
|--------------------------------------------------------------------------|----|
| 1. IR Curves .....                                                       | 2  |
| 2. Powder X-ray diffraction (PXRD) spectra .....                         | 2  |
| 3. X-ray Crystallography .....                                           | 3  |
| 4. Heats of formation calculations .....                                 | 9  |
| 5. Hole-electron and Interfragment Charge Transfer (IFCT) analysis ..... | 9  |
| 6. References.....                                                       | 12 |

## 1. IR Curves

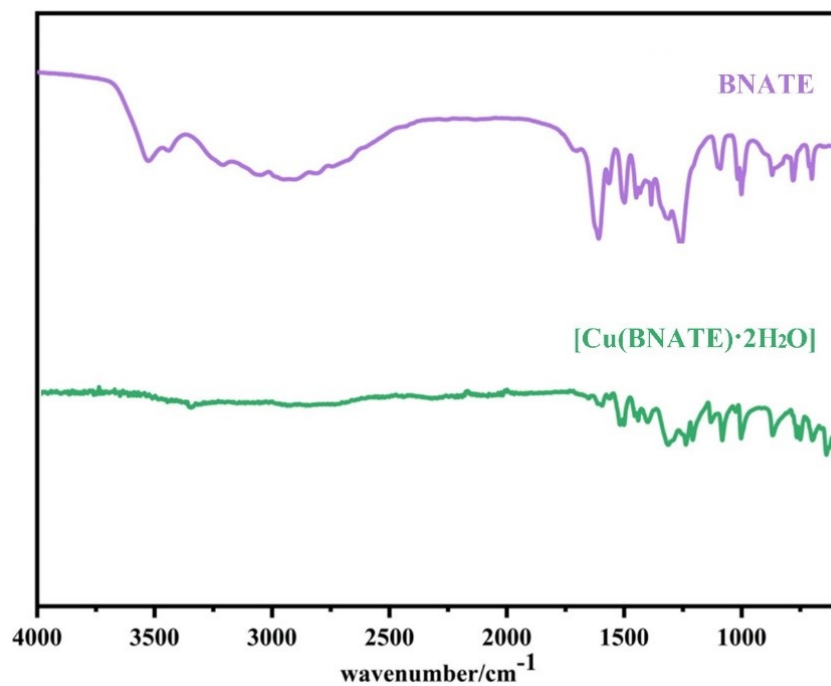

Figure S1. IR Curves of BNATE and  $[\text{Cu}(\text{BNATE})\cdot 2\text{H}_2\text{O}]$  (1)

## 2. Powder X-ray diffraction (PXRD) spectra

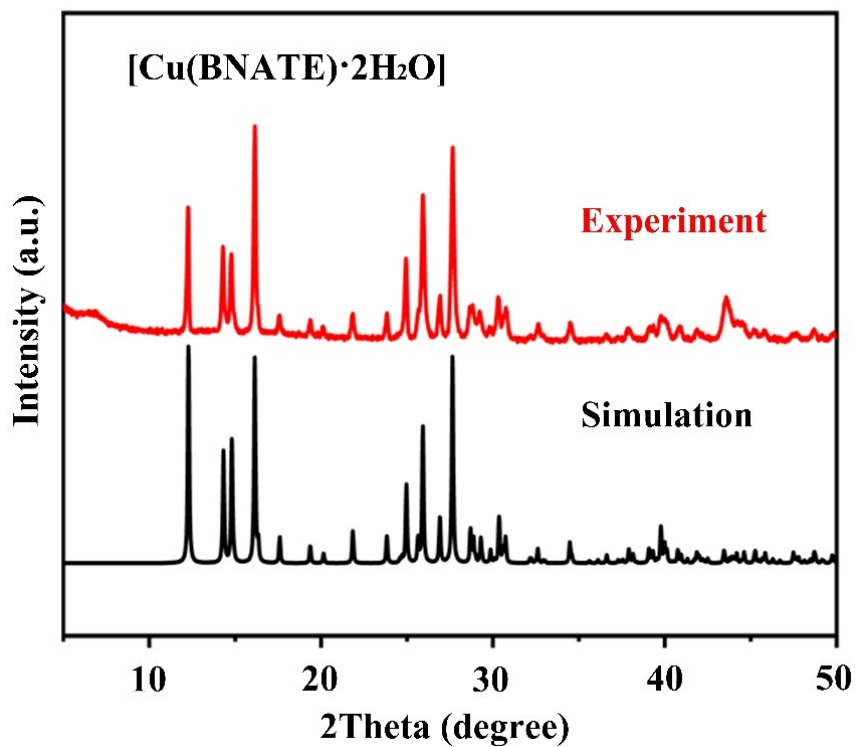

Figure S2. PXRD spectra of  $[\text{Cu}(\text{BNATE})\cdot 2\text{H}_2\text{O}]$  (1)

### 3. X-ray Crystallography

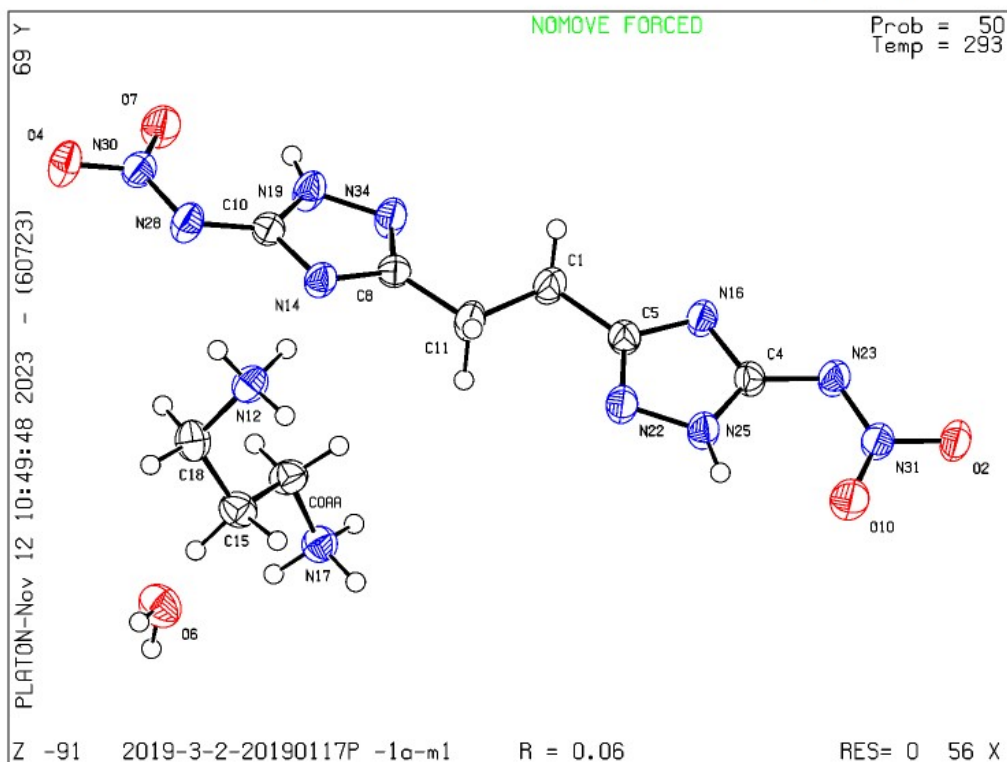

Figure S3. The asymmetric unit of BNATE-DAP<sup>1</sup>

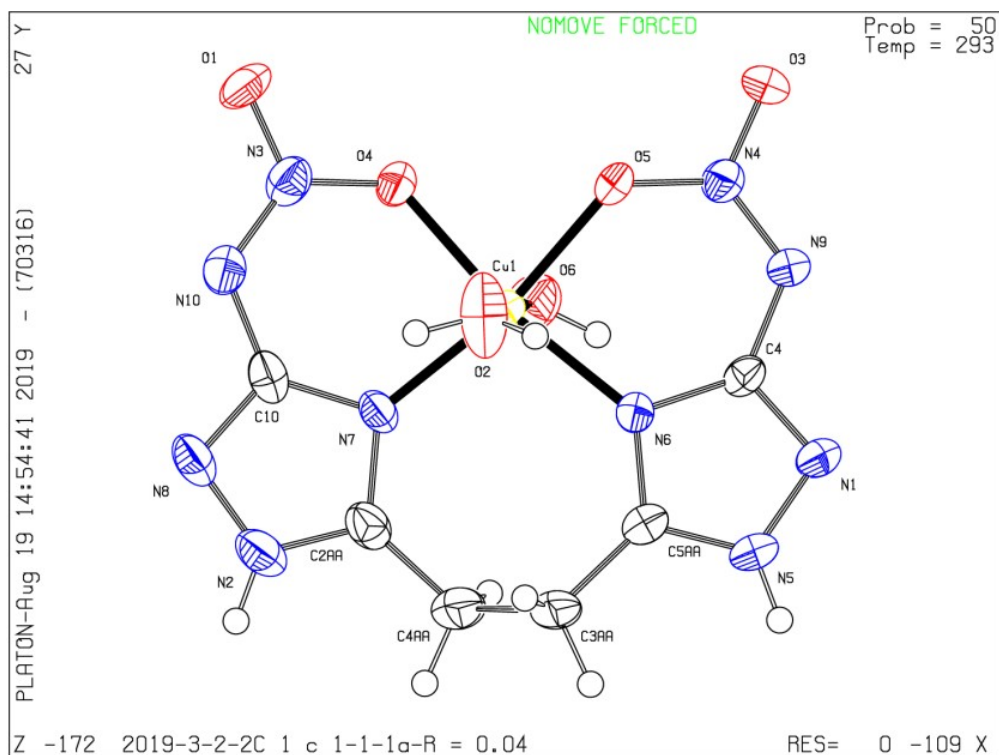

Figure S4. The asymmetric unit of [Cu(BNATE)·2H<sub>2</sub>O] (1)

**Table S1** Crystal data and structure refinement for [Cu(BNATE)·2H<sub>2</sub>O] and BNATE-DAP.

| Compounds                                   | [Cu(BNATE)·2H <sub>2</sub> O] (1)                               | BNATE-DAP                                                     |
|---------------------------------------------|-----------------------------------------------------------------|---------------------------------------------------------------|
| CCDC number                                 | 2313137                                                         | 2313138                                                       |
| Empirical formula                           | C <sub>6</sub> H <sub>10</sub> CuN <sub>10</sub> O <sub>6</sub> | C <sub>9</sub> H <sub>20</sub> N <sub>12</sub> O <sub>5</sub> |
| Formula weight                              | 381.78                                                          | 376.37                                                        |
| Temperature/K                               | 293.15                                                          | 293.15                                                        |
| Crystal system                              | monoclinic                                                      | triclinic                                                     |
| Space group                                 | Cc                                                              | P-1                                                           |
| a/Å                                         | 7.3292(4)                                                       | 7.7570(9)                                                     |
| b/Å                                         | 11.8696(8)                                                      | 8.0095(6)                                                     |
| c/Å                                         | 14.5806(8)                                                      | 13.8397(11)                                                   |
| α/°                                         | 90                                                              | 99.700(6)                                                     |
| β/°                                         | 99.093(5)                                                       | 102.391(8)                                                    |
| γ/°                                         | 90                                                              | 102.769(8)                                                    |
| Volume/Å <sup>3</sup>                       | 1252.49(13)                                                     | 797.74(13)                                                    |
| Z                                           | 4                                                               | 2                                                             |
| ρ <sub>calc</sub> /cm <sup>3</sup>          | 2.025                                                           | 1.567                                                         |
| μ/mm <sup>-1</sup>                          | 1.803                                                           | 0.129                                                         |
| F(000)                                      | 772.0                                                           | 396.0                                                         |
| Radiation                                   | MoKα (λ = 0.71073)                                              | MoKα (λ = 0.71073)                                            |
| 2θ range for data collection/°              | 7.426 to 57.894                                                 | 7.168 to 57.898                                               |
| Index ranges                                | -9 ≤ h ≤ 5, -8 ≤ k ≤ 15, -18 ≤ l ≤ 19                           | -10 ≤ h ≤ 6, -10 ≤ k ≤ 10, -18 ≤ l ≤ 18                       |
| Reflections collected                       | 2407                                                            | 5792                                                          |
| Independent reflections                     | 1970 [R <sub>int</sub> = 0.0226, R <sub>sigma</sub> = 0.0535]   | 3611 [R <sub>int</sub> = 0.0258, R <sub>sigma</sub> = 0.0655] |
| Data/restraints/parameters                  | 1970/2/209                                                      | 3611/0/315                                                    |
| Goodness-of-fit on F <sup>2</sup>           | 1.085                                                           | 1.039                                                         |
| Final R indexes [I ≥ 2σ (I)]                | R <sub>1</sub> = 0.0382, wR <sub>2</sub> = 0.0850               | R <sub>1</sub> = 0.0570, wR <sub>2</sub> = 0.1126             |
| Final R indexes [all data]                  | R <sub>1</sub> = 0.0408, wR <sub>2</sub> = 0.0886               | R <sub>1</sub> = 0.1005, wR <sub>2</sub> = 0.1396             |
| Largest diff. peak/hole / e Å <sup>-3</sup> | 0.43/-0.41                                                      | 0.22/-0.26                                                    |

**Table S2** Selected bond lengths [Å] for [Cu(BNATE)·2H<sub>2</sub>O].

| Atom | Atom | Length/Å | Atom | Atom | Length/Å  |
|------|------|----------|------|------|-----------|
| Cu1  | O2   | 2.397(6) | N3   | N10  | 1.307(8)  |
| Cu1  | O4   | 1.982(4) | N4   | N9   | 1.290(7)  |
| Cu1  | O5   | 1.965(5) | N5   | C5   | 1.331(7)  |
| Cu1  | O6   | 2.331(5) | N6   | C6   | 1.368(7)  |
| Cu1  | N6   | 1.967(5) | N6   | C5   | 1.331(8)  |
| Cu1  | N7   | 1.941(5) | N7   | C2   | 1.359(8)  |
| O1   | N3   | 1.240(6) | N7   | C1   | 1.377(7)  |
| O3   | N4   | 1.245(7) | N8   | C1   | 1.319(8)  |
| O4   | N3   | 1.295(6) | N9   | C6   | 1.387(8)  |
| O5   | N4   | 1.290(6) | N10  | C1   | 1.371(8)  |
| N1   | N5   | 1.357(7) | C2   | C4   | 1.470(10) |
| N1   | C6   | 1.308(7) | C3   | C4   | 1.538(9)  |
| N2   | N8   | 1.365(8) | C3   | C5   | 1.479(9)  |
| N2   | C2   | 1.316(8) |      |      |           |

**Table S3** Selected bond Angles [°] for [Cu(BNATE)·2H<sub>2</sub>O].

| Atom | Atom | Atom | Angle/°    | Atom | Atom | Atom | Angle/°  |
|------|------|------|------------|------|------|------|----------|
| O4   | Cu1  | O2   | 93.6(2)    | C5   | N5   | N1   | 110.5(5) |
| O4   | Cu1  | O6   | 87.4(2)    | C6   | N6   | Cu1  | 121.6(4) |
| O5   | Cu1  | O2   | 89.8(2)    | C5   | N6   | Cu1  | 134.0(4) |
| O5   | Cu1  | O4   | 82.79(19)  | C5   | N6   | C6   | 103.7(5) |
| O5   | Cu1  | O6   | 89.2(2)    | C2   | N7   | Cu1  | 133.9(4) |
| O5   | Cu1  | N6   | 87.4(2)    | C2   | N7   | C1   | 102.8(5) |
| O6   | Cu1  | O2   | 178.44(19) | C1   | N7   | Cu1  | 122.9(4) |
| N6   | Cu1  | O2   | 87.4(2)    | C1   | N8   | N2   | 101.9(5) |
| N6   | Cu1  | O4   | 170.1(2)   | N4   | N9   | C6   | 120.1(5) |
| N6   | Cu1  | O6   | 91.41(19)  | N3   | N10  | C10  | 120.7(5) |
| N7   | Cu1  | O2   | 87.1(2)    | N2   | C2   | N7   | 108.5(6) |
| N7   | Cu1  | O4   | 87.1(2)    | N2   | C2   | C4   | 123.9(6) |
| N7   | Cu1  | O5   | 169.2(2)   | N7   | C2   | C4   | 127.6(6) |
| N7   | Cu1  | O6   | 94.1(2)    | C5   | C3   | C4   | 115.1(6) |
| N7   | Cu1  | N6   | 102.8(2)   | N1   | C6   | N6   | 113.6(6) |
| N3   | O4   | Cu1  | 129.7(4)   | N1   | C6   | N9   | 115.5(5) |
| N4   | O5   | Cu1  | 131.3(4)   | N6   | C6   | N9   | 130.9(5) |
| C6   | N1   | N5   | 103.3(5)   | C2   | C4   | C3   | 115.5(6) |
| C2   | N2   | N8   | 112.3(5)   | N5   | C5   | N6   | 109.0(6) |
| O1   | N3   | O4   | 116.0(5)   | N5   | C5   | C3   | 122.2(5) |

|    |    |     |          |     |    |     |          |
|----|----|-----|----------|-----|----|-----|----------|
| O1 | N3 | N10 | 118.9(5) | N6  | C5 | C3  | 128.8(5) |
| O4 | N3 | N10 | 125.1(5) | N8  | C1 | N7  | 114.4(6) |
| O3 | N4 | O5  | 115.4(5) | N8  | C1 | N10 | 115.6(5) |
| O3 | N4 | N9  | 118.7(5) | N10 | C1 | N7  | 130.0(6) |
| O5 | N4 | N9  | 125.9(5) |     |    |     |          |

**Table S4** Selected torsion Angles [°] for [Cu(BNATE)·2H<sub>2</sub>O].

| <b>A</b> | <b>B</b> | <b>C</b> | <b>D</b> | <b>Angle/°</b> |
|----------|----------|----------|----------|----------------|
| Cu1      | O4       | N3       | O1       | 164.4(5)       |
| Cu1      | O4       | N3       | N10      | -17.4(9)       |
| Cu1      | O5       | N4       | O3       | 171.1(5)       |
| Cu1      | O5       | N4       | N9       | -9.9(10)       |
| Cu1      | N6       | C6       | N1       | -170.1(4)      |
| Cu1      | N6       | C6       | N9       | 11.7(8)        |
| Cu1      | N6       | C5       | N5       | 168.8(5)       |
| Cu1      | N6       | C5       | C3       | -13.4(11)      |
| Cu1      | N7       | C2       | N2       | 171.0(4)       |
| Cu1      | N7       | C2       | C4       | -10.8(10)      |
| Cu1      | N7       | C1       | N8       | -171.9(4)      |
| Cu1      | N7       | C1       | N10      | 8.0(9)         |
| O1       | N3       | N10      | C1       | 176.2(6)       |
| O3       | N4       | N9       | C6       | 175.7(5)       |
| O4       | N3       | N10      | C1       | -2.0(9)        |
| O5       | N4       | N9       | C6       | -3.3(9)        |
| N1       | N5       | C5       | N6       | 0.9(7)         |
| N1       | N5       | C5       | C3       | -177.1(6)      |
| N2       | N8       | C1       | N7       | -1.1(7)        |
| N2       | N8       | C1       | N10      | 179.0(5)       |
| N2       | C2       | C4       | C3       | -122.6(7)      |
| N3       | N10      | C1       | N7       | 6.6(10)        |
| N3       | N10      | C1       | N8       | -173.5(5)      |
| N4       | N9       | C6       | N1       | -176.5(5)      |
| N4       | N9       | C6       | N6       | 1.7(9)         |
| N5       | N1       | C6       | N6       | -1.2(7)        |
| N5       | N1       | C6       | N9       | 177.4(5)       |
| N7       | C2       | C4       | C3       | 59.5(9)        |
| N8       | N2       | C2       | N7       | 1.0(7)         |
| N8       | N2       | C2       | C4       | -177.2(6)      |
| C2       | N2       | N8       | C1       | 0.1(7)         |
| C2       | N7       | C1       | N8       | 1.7(7)         |
| C2       | N7       | C1       | N10      | -178.4(6)      |
| C6       | N1       | N5       | C5       | 0.1(7)         |
| C6       | N6       | C5       | N5       | -1.5(7)        |

|    |    |    |    |           |
|----|----|----|----|-----------|
| C6 | N6 | C5 | C3 | 176.3(7)  |
| C4 | C3 | C5 | N5 | -125.9(7) |
| C4 | C3 | C5 | N6 | 56.5(10)  |
| C5 | N6 | C6 | N1 | 1.7(7)    |
| C5 | N6 | C6 | N9 | -176.5(6) |
| C5 | C3 | C4 | C2 | -83.6(8)  |
| C1 | N7 | C2 | N2 | -1.5(7)   |
| C1 | N7 | C2 | C4 | 176.6(6)  |

**Table S5** Selected bond lengths [Å] for BNATE-DAP.

| Atom | Atom | Length/Å | Atom | Atom | Length/Å |
|------|------|----------|------|------|----------|
| O2   | N31  | 1.282(2) | N22  | C5   | 1.313(3) |
| O4   | N30  | 1.275(2) | N23  | N31  | 1.305(3) |
| O7   | N30  | 1.246(2) | N23  | C4   | 1.380(3) |
| O10  | N31  | 1.238(2) | N25  | C4   | 1.333(3) |
| N12  | C18  | 1.482(3) | N28  | N30  | 1.306(3) |
| N14  | C8   | 1.365(3) | N28  | C10  | 1.374(3) |
| N14  | C10  | 1.335(3) | N34  | C8   | 1.320(3) |
| N16  | C4   | 1.332(3) | C1   | C5   | 1.492(3) |
| N16  | C5   | 1.364(3) | C1   | C11  | 1.499(3) |
| N17  | C0AA | 1.475(3) | C8   | C11  | 1.494(3) |
| N19  | N34  | 1.372(3) | C0AA | C15  | 1.510(3) |
| N19  | C10  | 1.336(3) | C15  | C18  | 1.510(4) |
| N22  | N25  | 1.370(3) |      |      |          |

**Table S6** Selected bond Angles [°] for BNATE-DAP.

| Atom | Atom | Atom | Angle/°    | Atom | Atom | Atom | Angle/°    |
|------|------|------|------------|------|------|------|------------|
| C10  | N14  | C8   | 103.96(18) | N16  | C4   | N25  | 109.58(19) |
| C4   | N16  | C5   | 103.51(18) | N25  | C4   | N23  | 131.7(2)   |
| C10  | N19  | N34  | 110.24(18) | N16  | C5   | C1   | 122.1(2)   |
| C5   | N22  | N25  | 102.87(17) | N22  | C5   | N16  | 114.1(2)   |
| N31  | N23  | C4   | 116.55(19) | N22  | C5   | C1   | 123.8(2)   |
| C4   | N25  | N22  | 109.94(18) | N14  | C8   | C11  | 121.9(2)   |
| N30  | N28  | C10  | 117.11(19) | N34  | C8   | N14  | 113.81(19) |
| O4   | N30  | N28  | 115.46(19) | N34  | C8   | C11  | 124.2(2)   |
| O7   | N30  | O4   | 119.99(18) | N14  | C10  | N19  | 109.17(19) |
| O7   | N30  | N28  | 124.55(19) | N14  | C10  | N28  | 119.02(19) |

**Table S7** Selected torsion Angles [°] for BNATE-DAP.

| A   | B    | C   | D   | Angle/°   |
|-----|------|-----|-----|-----------|
| N14 | C8   | C11 | C1  | -162.7(3) |
| N17 | C0AA | C15 | C18 | -168.8(2) |

---

|      |     |     |     |           |
|------|-----|-----|-----|-----------|
| N19  | N34 | C8  | N14 | -0.2(3)   |
| N19  | N34 | C8  | C11 | 177.8(3)  |
| N22  | N25 | C4  | N16 | 0.0(3)    |
| N22  | N25 | C4  | N23 | 179.5(3)  |
| N25  | N22 | C5  | N16 | -0.9(3)   |
| N25  | N22 | C5  | C1  | 179.3(3)  |
| N30  | N28 | C10 | N14 | 177.5(2)  |
| N30  | N28 | C10 | N19 | -1.6(4)   |
| N31  | N23 | C4  | N16 | -176.1(2) |
| N31  | N23 | C4  | N25 | 4.4(4)    |
| N34  | N19 | C10 | N14 | 0.6(3)    |
| N34  | N19 | C10 | N28 | 179.7(3)  |
| N34  | C8  | C11 | C1  | 19.5(4)   |
| C4   | N16 | C5  | N22 | 0.9(3)    |
| C4   | N16 | C5  | C1  | -179.3(3) |
| C4   | N23 | N31 | O2  | 178.3(2)  |
| C4   | N23 | N31 | O10 | -2.0(4)   |
| C5   | N16 | C4  | N23 | 179.9(2)  |
| C5   | N16 | C4  | N25 | -0.5(3)   |
| C5   | N22 | N25 | C4  | 0.5(3)    |
| C5   | C1  | C11 | C8  | -178.2(3) |
| C8   | N14 | C10 | N19 | -0.7(3)   |
| C8   | N14 | C10 | N28 | -179.9(2) |
| C10  | N14 | C8  | N34 | 0.5(3)    |
| C10  | N14 | C8  | C11 | -177.5(2) |
| C10  | N19 | N34 | C8  | -0.2(3)   |
| C10  | N28 | N30 | O4  | -178.1(2) |
| C10  | N28 | N30 | O7  | 2.5(4)    |
| C11  | C1  | C5  | N16 | 176.7(3)  |
| C11  | C1  | C5  | N22 | -3.5(4)   |
| C0AA | C15 | C18 | N12 | -68.7(3)  |

---



#### 4. Heats of formation calculations

The constant pressure reaction heat ( $\Delta_c U$ ) of chelate [Cu(BNATE)·2H<sub>2</sub>O] (1) was measured by the oxygen bomb calorimeter, and the value of  $\Delta_c U$  is the average of three independent experiment results. Standard molar combustion enthalpy ( $\Delta_c H_m^\theta$ ) can be obtained from the constant pressure reaction heat ( $\Delta_c U$ ) and equation 2. The standard molar combustion enthalpy ( $\Delta_f H$ ) of chelate [Cu(BNATE)·2H<sub>2</sub>O] (-453 kJ mol<sup>-1</sup>) was obtained from  $\Delta_c H_m^\theta$  according to equation 3. (CO<sub>2</sub>(g): -393.51 kJ mol<sup>-1</sup>; H<sub>2</sub>O(l): 285.85 kJ mol<sup>-1</sup>; CuO(s): -155.2 kJ mol<sup>-1</sup>)

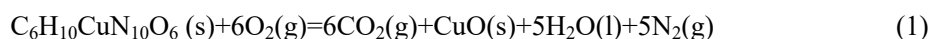

$$\Delta_c H_m^\theta = \Delta_c U + \Delta nRT \quad (2)$$

$$\Delta_f H_m^\theta = \sum \Delta_f H_m^\theta (\text{products}) - \Delta_c H_m^\theta \quad (3)$$

$\Delta n = n_g(\text{products}) - n_g(\text{reactants})$ , ( $n_g$  is the sum of the total moles of gas in the product or reactant,  $R = 8.314 \text{ J mol}^{-1} \text{ K}^{-1}$ ,  $T = 298.15 \text{ K}$ )

#### 5. Hole-electron and Interfragment Charge Transfer (IFCT) analysis

Gaussian16 software was used to perform geometric optimization on [Cu(BNATE)·2H<sub>2</sub>O] based on B3LYP density functional and 6-311G\* basis set, and the TD-DFT method was used to calculate its excited state and obtain its electronic transition properties. In addition, using Multiwfn and Multiwfn software, hole-electron analysis was performed on the specific excited state of [Cu(BNATE)·2H<sub>2</sub>O]. Its distribution is shown in Figure S5, where blue is the hole region, green is the electronic area, that is, electrons transfer from the blue area to the green area during the transition. It can be seen from the contribution of atoms to holes and electrons that when electrons transition in the [Cu(BNATE)·2H<sub>2</sub>O] molecule, 84.44% of holes and 68.58% of electrons are distributed on Cu<sup>2+</sup>, and other holes are mainly distributed on Cu<sup>2+</sup>. The other electrons are mainly distributed at the two nitro O atoms and two triazole N atoms participating in the coordination. Table S8 shows the hole and electron distribution percentages for each non-hydrogen atom position.

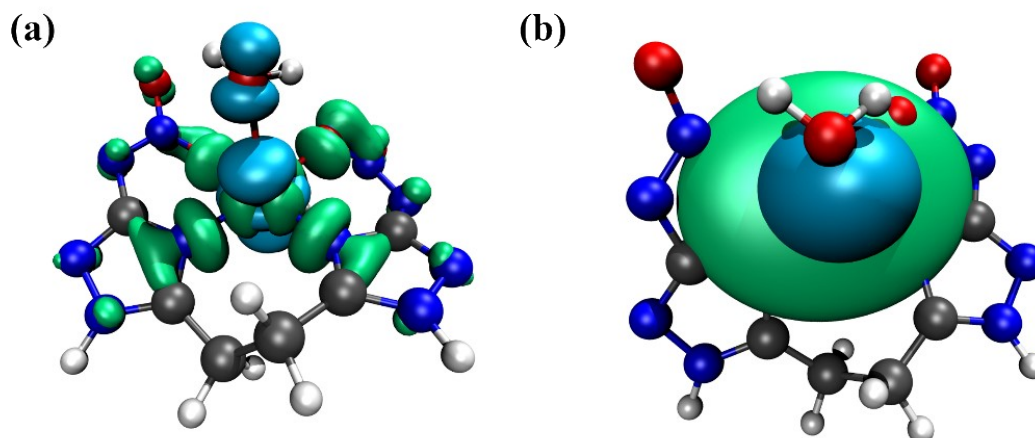

**Figure S5.** (a) Hole–electron distributions of [Cu(BNATE)·2H<sub>2</sub>O]; (b) C<sub>ele</sub> and C<sub>hole</sub> in [Cu(BNATE)·2H<sub>2</sub>O].

**Table S8** Contribution of each non-hydrogen atom to hole and electron.

| Atoms | Hole/% | Electron/% | Overlap/% | Diff/% |
|-------|--------|------------|-----------|--------|
| 1(Cu) | 84.44  | 68.58      | 76.1      | -15.86 |
| 2(O)  | 0.33   | 0.96       | 0.56      | 0.64   |
| 3(O)  | 4.61   | 0.02       | 0.28      | -4.59  |
| 6(O)  | 0.32   | 0.96       | 0.55      | 0.64   |
| 7(O)  | 1.78   | 5.83       | 3.22      | 4.06   |
| 8(O)  | 1.85   | 5.84       | 3.28      | 4      |
| 9(O)  | 4.52   | 0.02       | 0.28      | -4.5   |
| 12(N) | 0.03   | 0.46       | 0.12      | 0.43   |
| 13(N) | 0.02   | 0.36       | 0.09      | 0.33   |
| 15(N) | 0.06   | 0.47       | 0.17      | 0.41   |
| 16(N) | 0.06   | 0.47       | 0.17      | 0.41   |
| 17(N) | 0.02   | 0.36       | 0.09      | 0.33   |
| 19(N) | 0.42   | 5.87       | 1.56      | 5.46   |
| 20(N) | 0.42   | 5.86       | 1.57      | 5.44   |
| 21(N) | 0.04   | 0.46       | 0.14      | 0.41   |
| 22(N) | 0.17   | 0.86       | 0.39      | 0.69   |
| 23(N) | 0.2    | 0.87       | 0.42      | 0.67   |
| 24(C) | 0.13   | 0.37       | 0.22      | 0.24   |
| 25(C) | 0.01   | 0.04       | 0.02      | 0.02   |
| 28(C) | -0.01  | 0.32       | 0         | 0.33   |
| 29(C) | 0.01   | 0.04       | 0.02      | 0.02   |
| 32(C) | 0.13   | 0.37       | 0.22      | 0.24   |
| 33(C) | -0.01  | 0.32       | 0         | 0.33   |
| Sum   | 99.55  | 99.70      | □         | □      |

Use the IFCT (interfragment charge transfer) method of the Multiwfn program to quantitatively analyze the amount of electron transfer between each fragment of the molecule in a specific excited state transition, and use the electron density difference (CDD, charge density transfer) diagram between the excited state and the ground state (Fig. 4b), showing the electron density changes of each fragment in a visual form, and finally determining the electronic transition mode. The fragment division is shown in Figure S6, and the calculated electron transfer percentage of each fragment is shown in Table S9. Table S10 shows the Intrinsic charge transfer (CT) and local excitation (LE) percentage during the [Cu(BNATE)·2H<sub>2</sub>O] excitation process. CT mode is further divided into metal-ligand charge transfer (MLCT, metal-ligand charge transfer), ligand-to-metal charge transfer (LMCT, ligand-metal charge transfer) and charge transfer between ligands (LLCT, ligand-ligand charge transfer), while the LE mode includes metal-centered transitions (MC, metal centered) and

intra-ligand or ligand-centered transitions (LC, ligand centered).

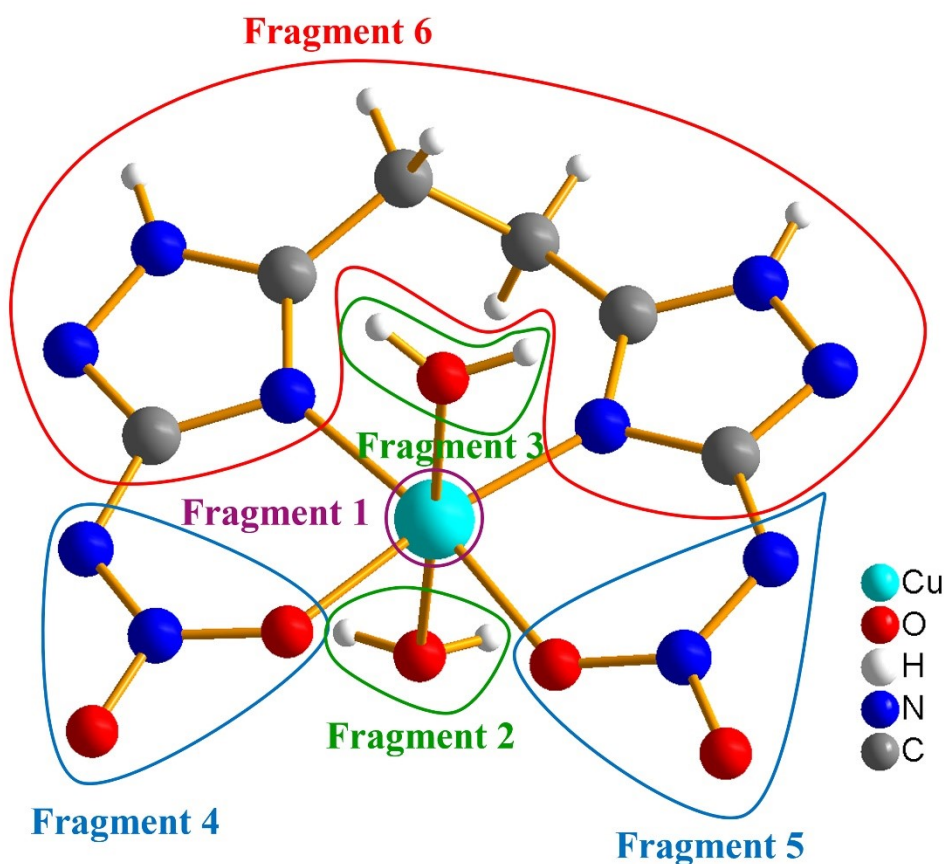

**Figure S6.** Fragments division of  $[\text{Cu}(\text{BNATE})\cdot 2\text{H}_2\text{O}]$

**Table S9** Transferred electrons between fragments.

| Donors <sup>a</sup>              | Receptors <sup>b</sup> |                          |                          |                    |                    |                                  |
|----------------------------------|------------------------|--------------------------|--------------------------|--------------------|--------------------|----------------------------------|
|                                  | $\text{Cu}^{2+}$       | $\text{H}_2\text{O}$ (1) | $\text{H}_2\text{O}$ (2) | $-\text{NNO}_2(1)$ | $-\text{NNO}_2(2)$ | $\text{C}_6\text{N}_6\text{H}_6$ |
| $\text{Cu}^{2+}$                 | 0.57913                | 0.00053                  | 0.00053                  | 0.06868            | 0.06874            | 0.12682                          |
| $\text{H}_2\text{O}$ (1)         | 0.03306                | 0.00003                  | 0.00003                  | 0.00392            | 0.00392            | 0.00724                          |
| $\text{H}_2\text{O}$ (2)         | 0.03243                | 0.00003                  | 0.00003                  | 0.00385            | 0.00385            | 0.00710                          |
| $-\text{NNO}_2$ (1)              | 0.01620                | 0.00001                  | 0.00001                  | 0.00192            | 0.00192            | 0.00355                          |
| $-\text{NNO}_2$ (2)              | 0.01647                | 0.00002                  | 0.00002                  | 0.00195            | 0.00195            | 0.00361                          |
| $\text{C}_6\text{N}_6\text{H}_6$ | 0.00853                | 0.00001                  | 0.00001                  | 0.00101            | 0.00101            | 0.00187                          |

<sup>a</sup> The molecular fragments that provide electrons during excitation; <sup>b</sup> The molecular fragments that receive electrons during excitation; The unit for all data in the table is *e*.

**Table S10.** Intrinsic charge transfer (CT) and local excitation (LE) percentage.

| CT (41.507 %) |          |          | LE (58.493 %) |        |
|---------------|----------|----------|---------------|--------|
| MLCT (e)      | LMCT (e) | LLCT (e) | MC (e)        | LC (e) |
| 0.2653        | 0.10669  | 0.04307  | 0.57913       | 0.0058 |

## 6. References

1. P. Pan, T. Wang, Q. Zhang, S. Zhu and L. Zhang, Crystal and Properties of 1,2-Bis(3,3'-Dinitroamine-1H-1,2,4-Triazol-5-yl) ethane and Its 1,3-Propanediamine Salt, *Chinese Journal of Energetic Materials*, 2021, 29, 732–738.
